# Supplementary material for: Biogeography of Southern Ocean prokaryotes: a comparison of the Indian and Pacific sectors
Source: PubMed Central journal article supplement (PMC9303206; doi:10.1111/1462-2920.15906), 2022-02-16

### (a) All bacteria

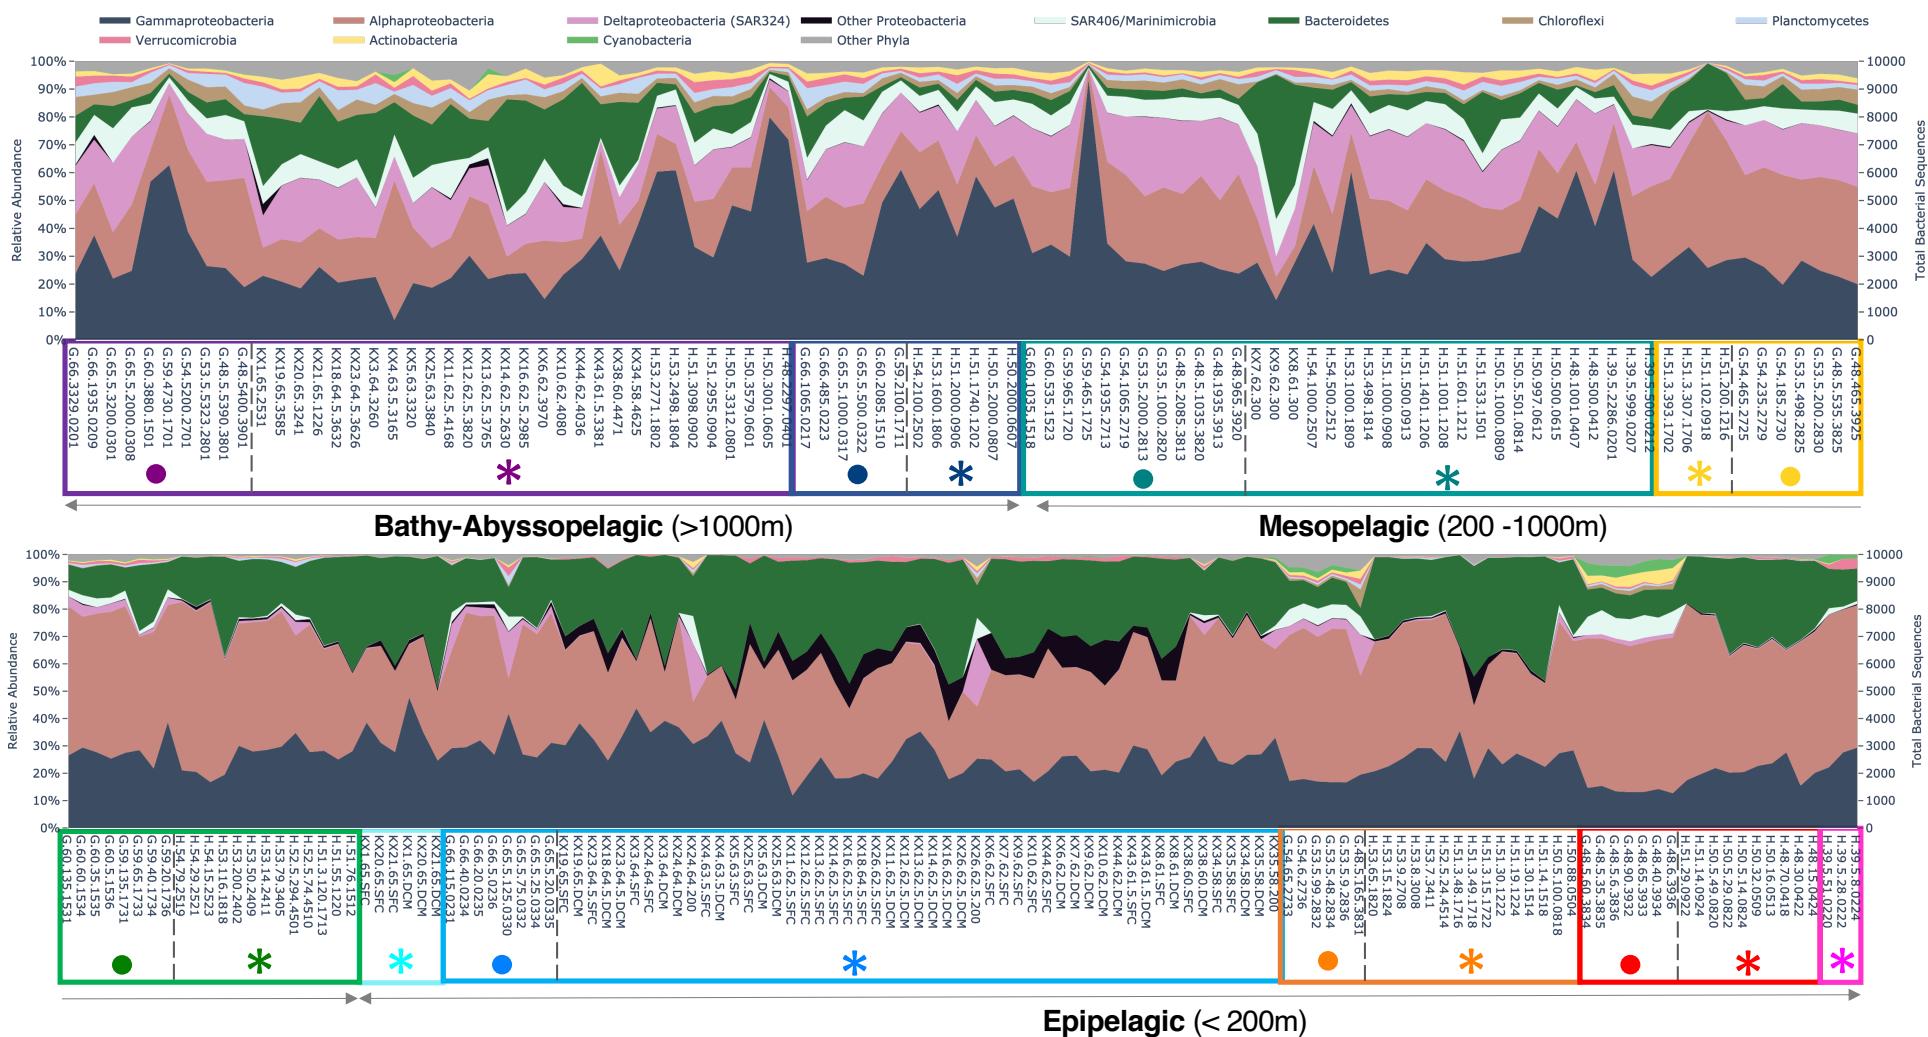

**Fig. S6:** (a) Full charts for relative abundance of major bacteria detected from the different water masses at phylum/class level, showing each of the 223 samples on the x-axis. Samples are arranged from high to low latitude in each water mass from the Pacific and Indian sector, as indicated by their respective sector/water mass symbols (see Fig. 1/ Fig. 2 legends). Detailed charts of the main families within (b) Gammaproteobacteria, (c) Alphaproteobacteria and (d) Bacteroidetes is also shown. The full chart for archaeal relative abundance is shown in (e), and a detailed chart of the main *Nitrosopumilus* species/zOTUs is shown in (f).





## (d) Bacteroidetes

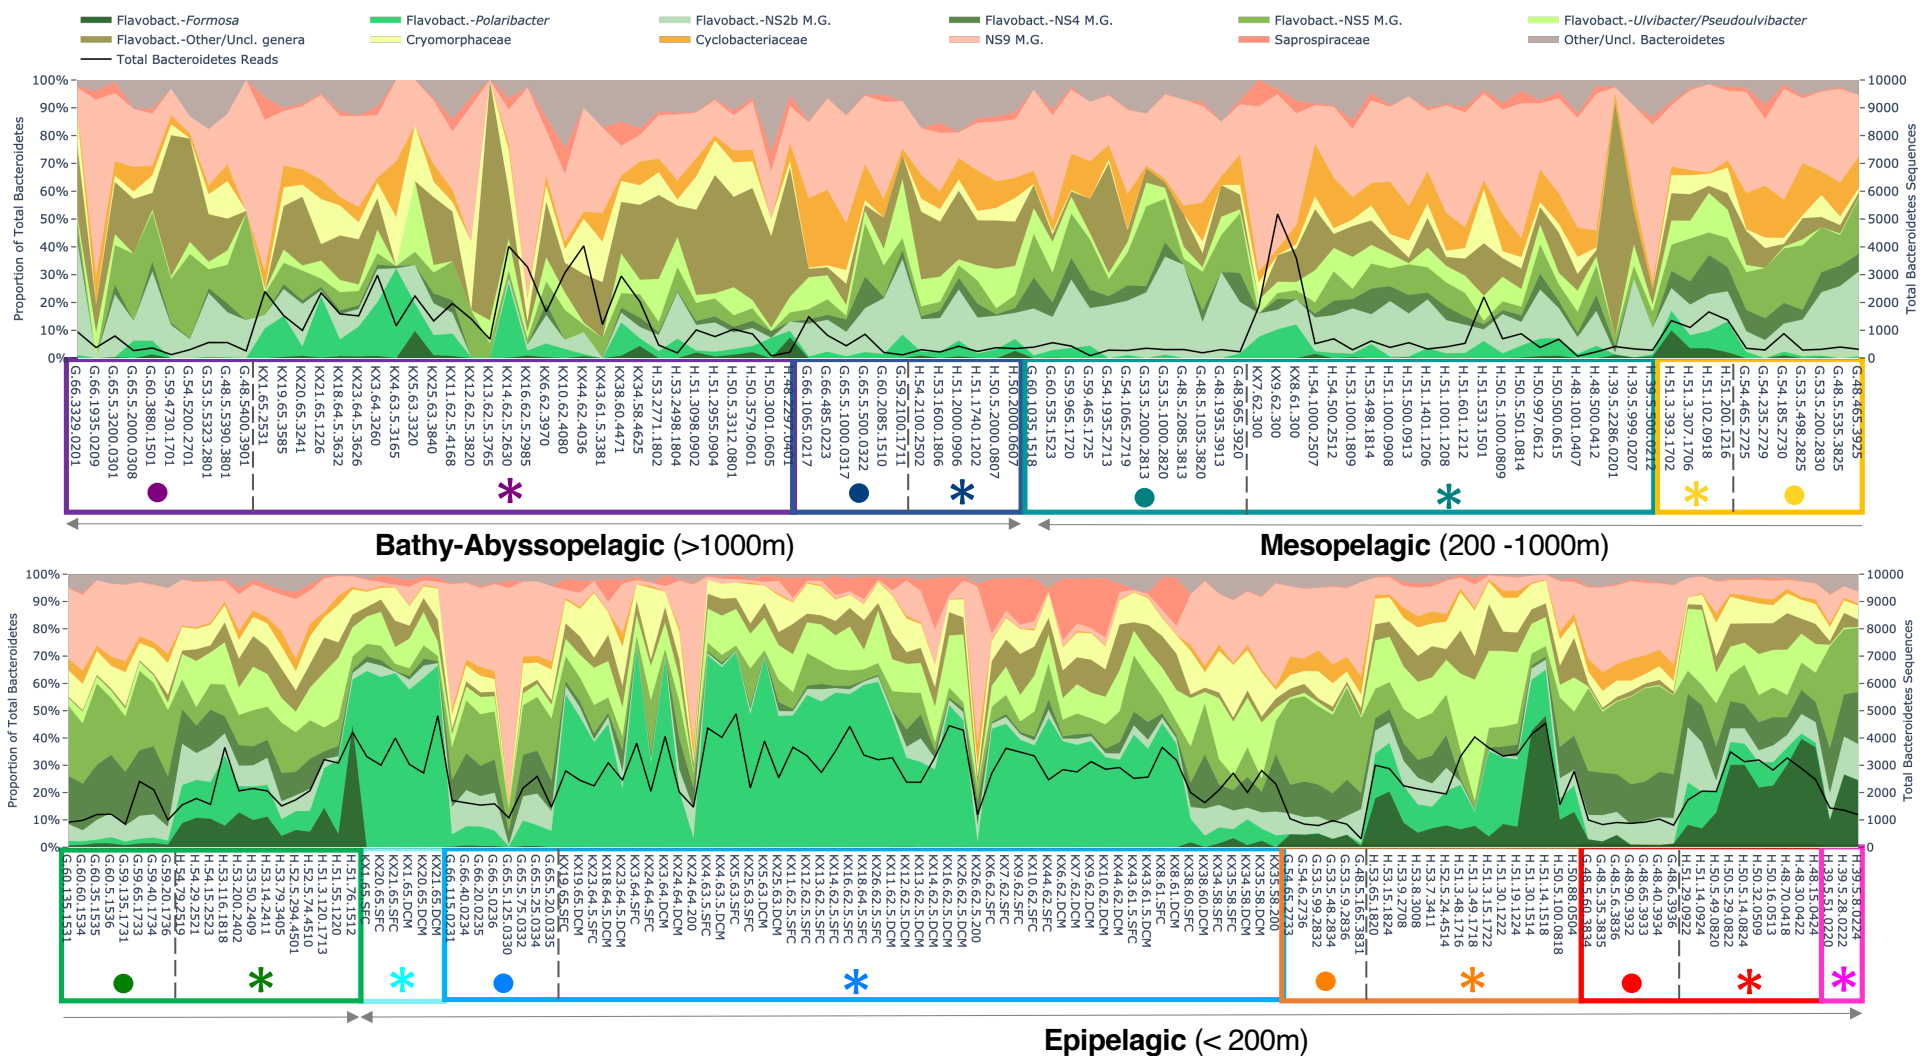

### (e) All archaea

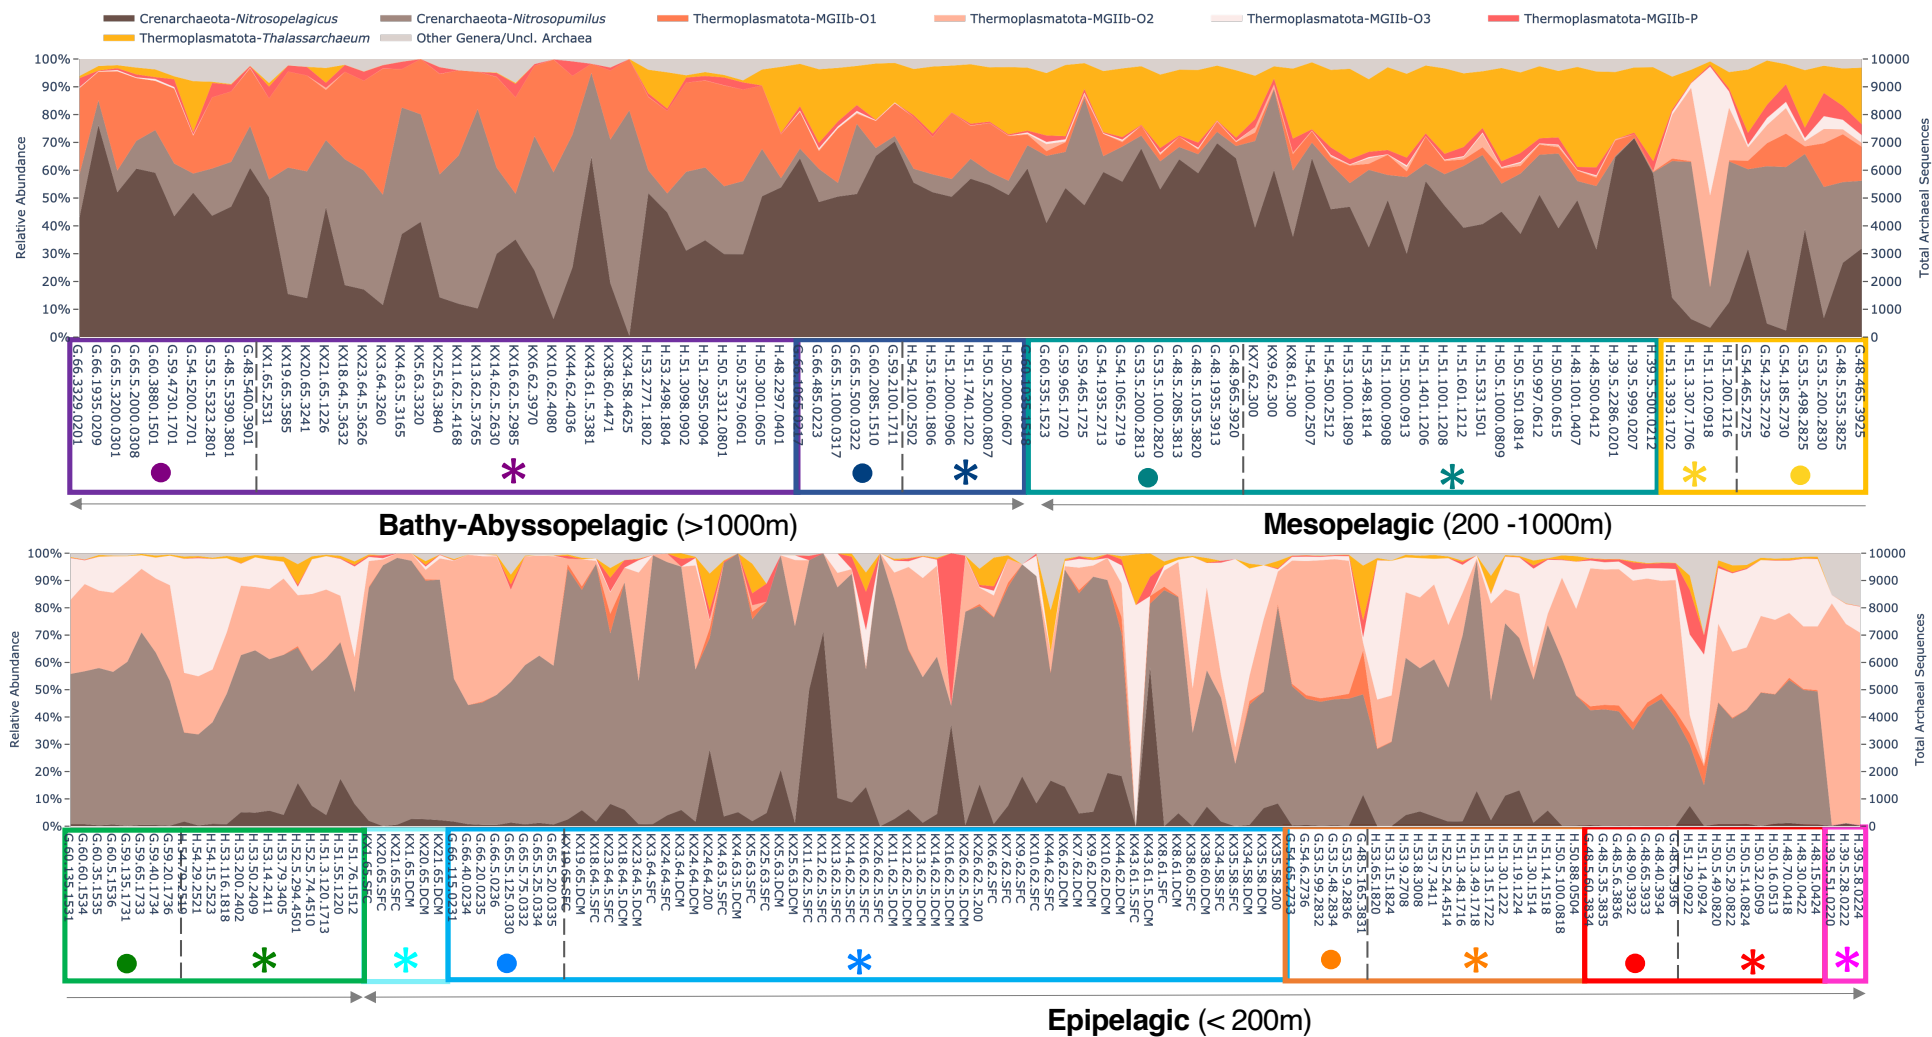

Supplement: EMI-24-2449-s005.pdf [file EMI-24-2449-s005.pdf]
